# Supplementary material for: Heterogeneous and homogeneous chiral Cu(ii) catalysis in water: enantioselective boron conjugate additions to dienones and dienoesters
Source: Royal Society of Chemistry journal article supplement (doi:10.1039/c3cc44324h), 2013-01-01
Supplement: c3cc44324h.pdf [file c3cc44324h.pdf]

# Heterogeneous and Homogeneous Chiral Cu(II) Catalysis in Water: Enantioselective Boron Conjugate Additions to Dienones and Dienoesters

Taku Kitanosono, Pengyu Xu and Shū Kobayashi\*

*Department of Chemistry, School of Sciences, The University of Tokyo,  
Hongo, Bunkyo-ku, Tokyo 113-0033, Japan*

## Electronic Supplementary Information For Additional Table, Schemes, and Figures

**Table S-1** Additions to Trienone

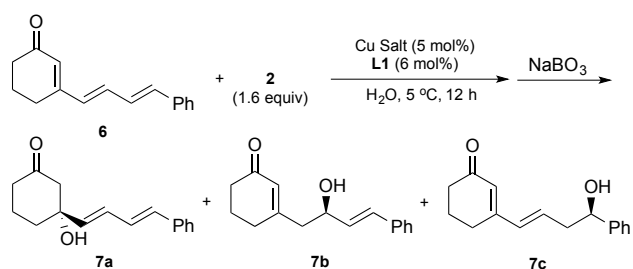

| Entr<br>y      | Cu salt              | Yield (%) | <b>7a/7b/7c</b> | E.r.                                       |
|----------------|----------------------|-----------|-----------------|--------------------------------------------|
| 1              | Cu(OH) <sub>2</sub>  | 71        | < 1/74/26       | 86:14 ( <b>7b</b> )<br>73:27 ( <b>7c</b> ) |
| 2 <sup>a</sup> | Cu(OH) <sub>2</sub>  | 86        | > 99/< 1/< 1    | 96:4 ( <b>7a</b> )                         |
| 3              | Cu(OAc) <sub>2</sub> | 87        | > 99/< 1/< 1    | 95.5:4.5 ( <b>7a</b> )                     |

<sup>a</sup> 6 mol% AcOH was added.

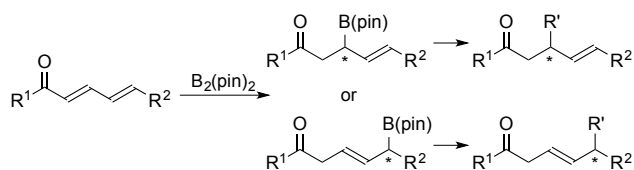

**Scheme S-1** Boron Conjugate Addition to  $\alpha,\beta,\gamma,\delta$ -Unsaturated Dienones and Dienoesters

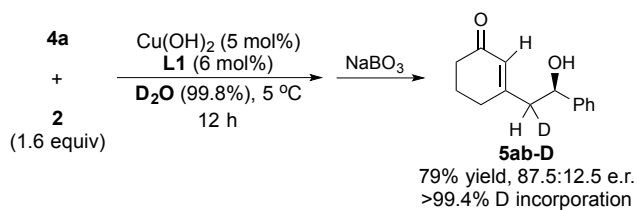

**Scheme S-2** Deuteration of cyclic dienone **4a** in  $D_2O$

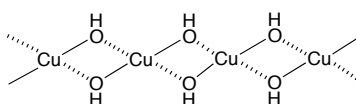

**Fig. S-1** Polymeric  $\mu$ -hydroxide Cu

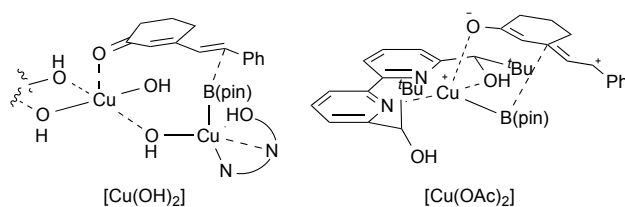

**Fig. S-2** Plausible intermediate structures of  $Cu(OH)_2$ - and  $Cu(OAc)_2$ -catalyzed reactions of cyclic dienone **4a**
